# Supplementary material
Source: PubMed Central journal article supplement (PMC2785637)
Supplement: supp_M109.031336_TableS1.pdf [file supp_M109.031336_TableS1.pdf]

**Table S1: List of primers used for quantitative real time RT-PCR**

| <b>Gene</b>   | <b>Protein</b>                                                | <b>Forward Primer (5'→3')</b> | <b>Reverse Primer (5'→3')</b> | <b>Source</b> |
|---------------|---------------------------------------------------------------|-------------------------------|-------------------------------|---------------|
| <i>Abca1</i>  | ATP-binding cassette, sub-family A (ABC1), member 1           | AACAGTTTGTGGCCCTTTTG          | AAGTTCCAGGCTGGGGTACT          | This work     |
| <i>Abcg1</i>  | ATP-binding cassette, sub-family G (WHITE), member 1          | TCAACAGTGGAGAGCTGGTG          | TGAACAGTGAGGTGAGGCAG          | This work     |
| <i>Agpat1</i> | 1-Acylglycerol-3-phosphate O-acyltransferase 1                | CAGCTCCAGTGCCAAGTATT          | GAACTCTGGTGGTTGGACAC          | This work     |
| <i>Agpat2</i> | 1-Acylglycerol-3-phosphate O-acyltransferase 2                | GCTCTTCACCTCAGGAACAA          | AGGCTCCTTAATGGCAGAGT          | This work     |
| <i>Acaca</i>  | Acetyl-Coenzyme A carboxylase $\alpha$                        | TGACAGACTGATCGCAGAGAAAG       | TGGAGAGCCCCACACACA            | (1)           |
| <i>Cidec</i>  | Fat-specific protein 27                                       | GCAAGAAGAGAGCCCAGCTA          | GCAGGTCATAGGAAAGCGAG          | This work     |
| <i>Dgat1</i>  | Diacylglycerol O-acyltransferase 1                            | ACGACGAGTTCTTGAGATGC          | AGTCCATATCCTTGAAGGGC          | This work     |
| <i>Dgat2</i>  | Diacylglycerol O-acyltransferase 2                            | GCCCTTCAAGGATATGGACT          | GA CTCAGCATTCCACCAATC         | This work     |
| <i>Elovl6</i> | ELOVL family member 6                                         | TTTTCGTGTGGCTTGTTTACGT        | TTGATCCCATTCCCACAGAAG         | This work     |
| <i>Fasn</i>   | Fatty acid synthase                                           | GCTGCGGAAACTTCAGGAAAT         | AGAGACGTGTCACTCCTGGACTT       | (1)           |
| <i>G6pd</i>   | Glucose-6-phosphate dehydrogenase                             | GAACGCAAAGCTGAAGTGAGACT       | TCATTACGCTTGCACTGTTGGT        | (2)           |
| <i>Gpat1</i>  | Glycerol-3-phosphate acyltransferase, isoform 1 mitochondrial | CAACACCATCCCCGACATC           | GTGACCTTCGATTATGCGATCA        | (2)           |
| <i>Gpat4</i>  | Glycerol-3-phosphate acyltransferase, isoform 4 microsomal*   | AGAAATGGTGGCATCTGTGT          | CTGAATCACACCCATAAGGC          | This work     |

| <b>Gene</b>   | <b>Protein</b>                                                     | <b>Forward Primer (5'→3')</b> | <b>Reverse Primer (5'→3')</b> | <b>Source</b> |
|---------------|--------------------------------------------------------------------|-------------------------------|-------------------------------|---------------|
| <i>Lpin1</i>  | Lipin 1                                                            | GCCGGAAGACTCCTGATAAAATG       | GTTGGCGACTGGTCACTAAAAGT       | This work     |
| <i>Lpin2</i>  | Lipin 2                                                            | GCACTGGGTCAATGATAAGG          | GTTTCCAAAGGCAGCATAGA          | This work     |
| <i>Lpin3</i>  | Lipin 3                                                            | GCCTAAGGTGGCGAAAGCT           | CACAGATCGCCTCAGCCATA          | This work     |
| <i>Me1</i>    | Malic enzyme 1, NADP(+)-dependent,<br>cytosolic                    | GCCGGCTCTATCCTCCTTTG          | TTTGTATGCATCTTGCACAATCTTT     | (2)           |
| <i>Nr1h3</i>  | LXR $\alpha$ , nuclear receptor subfamily 1,<br>group H, member 3  | GGGAGGAGTGTGTGCTGTCAG         | GAGCGCCTGTTACTACTGTTGC        | (3)           |
| <i>Mlxipl</i> | ChREBP, MLX interacting protein-like                               | TCAGCACTTCCACAAGCATC          | GCATTAGCAACAGTGCAGGA          | This work     |
| <i>Pcyt1a</i> | Phosphocholine cytidyltransferase 1,<br>alpha isoform              | TGGATGCACAGAGTTCAGCTAAA       | TGCTCCATTAGGGCCAGGT           | This work     |
| <i>Pcyt1b</i> | Phosphocholine cytidyltransferase 1,<br>beta isoform               | GTGGCTCACGATGATATTCC          | TTCATCTTGTCCACCTGGTT          | This work     |
| <i>Pcyt2</i>  | Phosphoethanolamine cytidyltransferase                             | GCGCTGCTGGGCTGAA              | GTTGGAGTGGCCATAATGCA          | This work     |
| <i>Pemt</i>   | Phosphatidylethanolamine N-<br>methyltransferase                   | GGCATCTGCATCCTGCTTTT          | TTGGGCTGGCTCATCATAGC          | This work     |
| <i>Pisd</i>   | Phosphatidylserine decarboxylase                                   | TGTAACACATGCCAACAAGG          | ATCTTATAAGGTCAGCCCCG          | This work     |
| <i>Pklr</i>   | Pyruvate kinase liver and red blood cell                           | AGCAGTATGGAAGGGCCAG           | CATCCCTGCCTTGATCATCT          | This work     |
| <i>Pparg</i>  | Peroxisome proliferator activated receptor $\gamma$                | ACATAAAGTCCTTCCCGCTGACCA      | AAATTCGGATGGCCACCTCTTTGC      | (4)           |
| <i>Pparg2</i> | Peroxisome proliferator activated receptor<br>$\gamma$ , isoform 2 | GTGAAACTCTGGGAGATTCTCC        | AACCATTGGGTCAGCTCTTG          | This work     |
| <i>Ppid</i>   | Cyclophilin B, peptidylprolyl isomerase B                          | TGGAGAGCACCAAGACAGACA         | TGCCGGAGTCGACAATGAT           | (2)           |

| Gene          | Protein                                                            | Forward Primer (5'→3') | Reverse Primer (5'→3')        | Source    |
|---------------|--------------------------------------------------------------------|------------------------|-------------------------------|-----------|
| <i>Ptdss1</i> | Phosphatidylserine synthase 1                                      | ATTCTCCCTGTCTACCCTGG   | TGCATACACTTCCATTCCCT          | This work |
| <i>Ptdss2</i> | Phosphatidylserine synthase 2                                      | GGACTGGAAGTGCAGAAGAA   | CAAGTTCCAGGCTCACTGTT          | This work |
| <i>Scd1</i>   | Stearoyl-Coenzyme A desaturase 1                                   | CCGGAGACCCCTTAGATCGA   | TAGCCTGTAAAAGATTTCTGCAA<br>CC | (1)       |
| <i>Srebf1</i> | SREBP-1c, sterol regulatory element binding transcription factor 1 | GGAGCCATGGATTGCACATT   | GGCCCGGGAAGTCACTGT            | (1)       |

\* Previously annotated as *Agpat6* (5).

#### References

1. Yang, J., Goldstein, J. L., Hammer, R. E., Moon, Y. A., Brown, M. S., and Horton, J. D. (2001) *Proc. Natl. Acad. Sci. U. S. A.* **98**, 13607-13612
2. Liang, G., Yang, J., Horton, J. D., Hammer, R. E., Goldstein, J. L., and Brown, M. S. (2002) *J. Biol. Chem.* **277**, 9520-9528
3. Bobard, A., Hainault, I., Ferre, P., Foufelle, F., and Bossard, P. (2005) *J. Biol. Chem.* **280**, 199-206
4. Oyadomari, S., Harding, H. P., Zhang, Y., Oyadomari, M., and Ron, D. (2008) *Cell Metab.* **7**, 520-532
5. Chen, Y. Q., Kuo, M. S., Li, S., Bui, H. H., Peake, D. A., Sanders, P. E., Thibodeaux, S. J., Chu, S., Qian, Y. W., Zhao, Y., Bredt, D. S., Moller, D. E., Konrad, R. J., Beigneux, A. P., Young, S. G., and Cao, G. (2008) *J. Biol. Chem.* **283**, 10048-10057
